# Supplementary material for: Thermal properties and radical monitoring after gamma, X-ray, and electron beam irradiation in polyamides
Source: Royal Society of Chemistry journal article supplement (doi:10.1039/d4cp02358g), 2024-01-01
Supplement: d4cp02358g1.pdf [file d4cp02358g1.pdf]

## Supporting information:

# Thermal properties and radical monitoring after gamma, X-ray, and electron beam irradiation in Polyamide

## Electron Spin Resonance

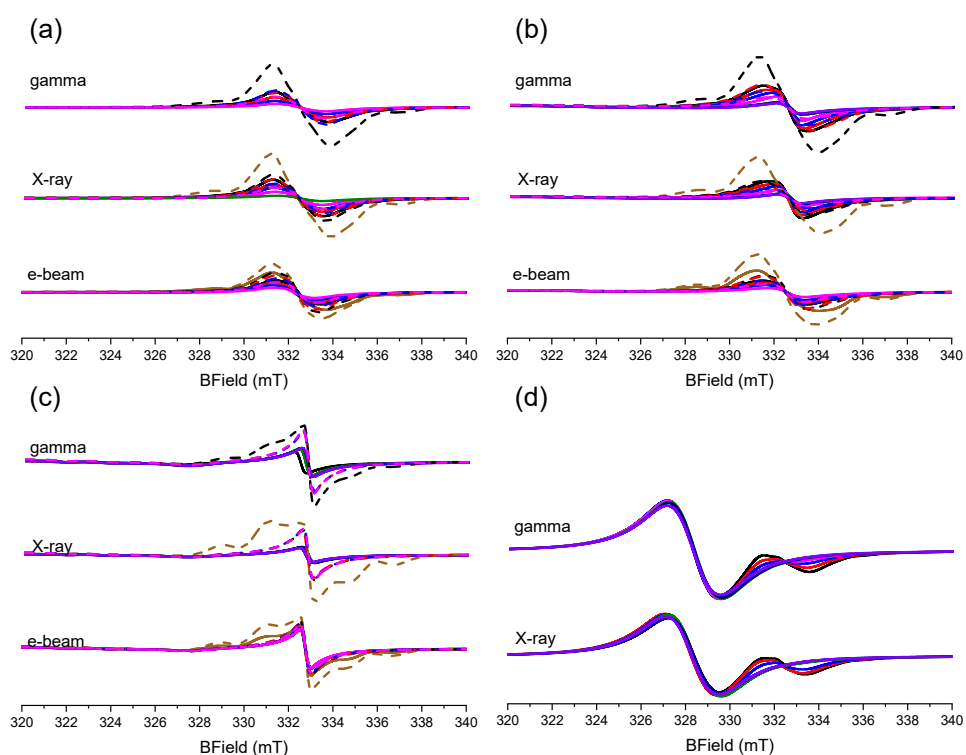

Figure S1: ESR signal of irradiated PA samples by gamma, X-ray and e-beam at 50 kGy (solid line) and 100 kGy (dotted line) ESR signal were recorded at one day (brown line) 9 days (black line), 15 days (red line), 30 days (blue line), 60 days (pink line), 120 days (green line), 180 days (navy line) and 380 days (purple line). (a) PA-1. (b) PA-2. (c) PA-3. (d) PA-4.

## Model regression results of PA-1

### Method

Categorical predictor coding (1; 0)

### Regression Equation

#### Irradiation technologies

|        |         |   |                                                                               |
|--------|---------|---|-------------------------------------------------------------------------------|
| e-beam | Spin/mg | = | 154982362322843 - 7417296941425 Ageing after irradiation + 5306709765816 Dose |
| gamma  | Spin/mg | = | 143404658668274 - 7417296941425 Ageing after irradiation + 5306709765816 Dose |
| X-ray  | Spin/mg | = | 217719144189160 - 7417296941425 Ageing after irradiation + 5306709765816 Dose |

### Coefficients

| Term | Coef | SE Coef | T-Value | P-Value | VIF |
|------|------|---------|---------|---------|-----|
|------|------|---------|---------|---------|-----|

|                          |              |             |       |       |      |
|--------------------------|--------------|-------------|-------|-------|------|
| Constant                 | 1,43405E+14  | 1,00518E+14 | 1,43  | 0,168 |      |
| Ageing after irradiation | -7,41730E+12 | 1,28439E+12 | -5,77 | 0,000 | 1,01 |
| Dose                     | 5,30671E+12  | 1,04966E+12 | 5,06  | 0,000 | 1,00 |
| Irradiation technologies |              |             |       |       |      |
| e-beam                   | 1,15777E+13  | 6,48673E+13 | 0,18  | 0,860 | 1,43 |
| X-ray                    | 7,43145E+13  | 6,62274E+13 | 1,12  | 0,274 | 1,42 |

### Model Summary

| S           | R-sq   | R-sq(adj) | R-sq(pred) |
|-------------|--------|-----------|------------|
| 1,35939E+14 | 74,57% | 69,94%    | 61,42%     |

### Analysis of Variance

| Source                   | DF | Adj SS      | Adj MS      | F-Value | P-Value |
|--------------------------|----|-------------|-------------|---------|---------|
| Regression               | 4  | 1,19204E+30 | 2,98009E+29 | 16,13   | 0,000   |
| Ageing after irradiation | 1  | 6,16293E+29 | 6,16293E+29 | 33,35   | 0,000   |
| Dose                     | 1  | 4,72327E+29 | 4,72327E+29 | 25,56   | 0,000   |
| Irradiation technologies | 2  | 2,81628E+28 | 1,40814E+28 | 0,76    | 0,479   |
| Error                    | 22 | 4,06546E+29 | 1,84794E+28 |         |         |
| Total                    | 26 | 1,59858E+30 |             |         |         |

### Fits and Diagnostics for Unusual Observations

| Obs | Spin/mg     | Fit         | Resid       | Std Resid |
|-----|-------------|-------------|-------------|-----------|
| 5   | 8,91608E+14 | 6,07320E+14 | 2,84288E+14 | 2,33 R    |
| 13  | 1,11068E+15 | 7,40973E+14 | 3,69703E+14 | 3,02 R    |

### Model regression results of PA-2

#### Method

Categorical predictor coding (1; 0)

#### Regression Equation

| Irradiation technologies |         |                                                                                 |
|--------------------------|---------|---------------------------------------------------------------------------------|
| e-beam                   | Spin/mg | = 246928278495736 - 5708020409260 Ageing after irradiation + 1824114350704 Dose |
| gamma                    | Spin/mg | = 347424098552292 - 5708020409260 Ageing after irradiation + 1824114350704 Dose |
| X-ray                    | Spin/mg | = 283556043325953 - 5708020409260 Ageing after irradiation + 1824114350704 Dose |

#### Coefficients

| Term                     | Coef         | SE Coef     | T-Value | P-Value | VIF  |
|--------------------------|--------------|-------------|---------|---------|------|
| Constant                 | 3,47424E+14  | 9,38518E+13 | 3,70    | 0,001   |      |
| Ageing after irradiation | -5,70802E+12 | 1,19921E+12 | -4,76   | 0,000   | 1,01 |
| Dose                     | 1,82411E+12  | 9,80049E+11 | 1,86    | 0,076   | 1,00 |
| Irradiation technologies |              |             |         |         |      |
| e-beam                   | -1,00496E+14 | 6,05655E+13 | -1,66   | 0,111   | 1,43 |
| X-ray                    | -6,38681E+13 | 6,18355E+13 | -1,03   | 0,313   | 1,42 |

### Model Summary

| S           | R-sq   | R-sq(adj) | R-sq(pred) |
|-------------|--------|-----------|------------|
| 1,26924E+14 | 56,25% | 48,29%    | 34,17%     |

### Analysis of Variance

| Source                   | DF | Adj SS      | Adj MS      | F-Value | P-Value |
|--------------------------|----|-------------|-------------|---------|---------|
| Regression               | 4  | 4,55622E+29 | 1,13905E+29 | 7,07    | 0,001   |
| Ageing after irradiation | 1  | 3,64978E+29 | 3,64978E+29 | 22,66   | 0,000   |
| Dose                     | 1  | 5,58080E+28 | 5,58080E+28 | 3,46    | 0,076   |

|                          |    |             |             |      |       |
|--------------------------|----|-------------|-------------|------|-------|
| Irradiation technologies | 2  | 4,47425E+28 | 2,23713E+28 | 1,39 | 0,270 |
| Error                    | 22 | 3,54413E+29 | 1,61097E+28 |      |       |
| Total                    | 26 | 8,10035E+29 |             |      |       |

### Fits and Diagnostics for Unusual Observations

| Obs | Spin/mg     | Fit         | Resid       | Std Resid |
|-----|-------------|-------------|-------------|-----------|
| 5   | 7,65649E+14 | 4,78463E+14 | 2,87186E+14 | 2,52 R    |
| 13  | 7,25191E+14 | 4,60259E+14 | 2,64931E+14 | 2,32 R    |
| 23  | 6,63203E+14 | 4,23632E+14 | 2,39572E+14 | 2,08 R    |

R Large residual

### Model regression results of PA-3

#### Method

Categorical predictor coding (1; 0)

#### Regression Equation

##### Irradiation technologies

e-beam Spin/mg = 55944561495113 - 2042747866180 Ageing after irradiation + 5099031780666 Dose

gamma Spin/mg = 105905108987982 - 2042747866180 Ageing after irradiation + 5099031780666 Dose

X-ray Spin/mg = 41581151504161 - 2042747866180 Ageing after irradiation + 5099031780666 Dose

#### Coefficients

| Term                     | Coef         | SE Coef     | T-Value | P-Value | VIF  |
|--------------------------|--------------|-------------|---------|---------|------|
| Constant                 | 1,05905E+14  | 1,20464E+14 | 0,88    | 0,389   |      |
| Ageing after irradiation | -2,04275E+12 | 1,53926E+12 | -1,33   | 0,198   | 1,01 |
| Dose                     | 5,09903E+12  | 1,25795E+12 | 4,05    | 0,001   | 1,00 |
| Irradiation technologies |              |             |         |         |      |
| e-beam                   | -4,99605E+13 | 7,77393E+13 | -0,64   | 0,527   | 1,43 |
| X-ray                    | -6,43240E+13 | 7,93694E+13 | -0,81   | 0,426   | 1,42 |

#### Model Summary

| S           | R-sq   | R-sq(adj) | R-sq(pred) |
|-------------|--------|-----------|------------|
| 1,62914E+14 | 46,44% | 36,70%    | 19,01%     |

#### Analysis of Variance

| Source                   | DF | Adj SS      | Adj MS      | F-Value | P-Value |
|--------------------------|----|-------------|-------------|---------|---------|
| Regression               | 4  | 5,06191E+29 | 1,26548E+29 | 4,77    | 0,006   |
| Ageing after irradiation | 1  | 4,67439E+28 | 4,67439E+28 | 1,76    | 0,198   |
| Dose                     | 1  | 4,36081E+29 | 4,36081E+29 | 16,43   | 0,001   |
| Irradiation technologies | 2  | 1,89681E+28 | 9,48403E+27 | 0,36    | 0,704   |
| Error                    | 22 | 5,83902E+29 | 2,65410E+28 |         |         |
| Total                    | 26 | 1,09009E+30 |             |         |         |

### Fits and Diagnostics for Unusual Observations

| Obs | Spin/mg     | Fit         | Resid       | Std Resid |
|-----|-------------|-------------|-------------|-----------|
| 5   | 9,86742E+14 | 5,97424E+14 | 3,89319E+14 | 2,66 R    |
| 13  | 8,54593E+14 | 5,49442E+14 | 3,05152E+14 | 2,08 R    |

R Large residual

## Thermal properties (DSC)

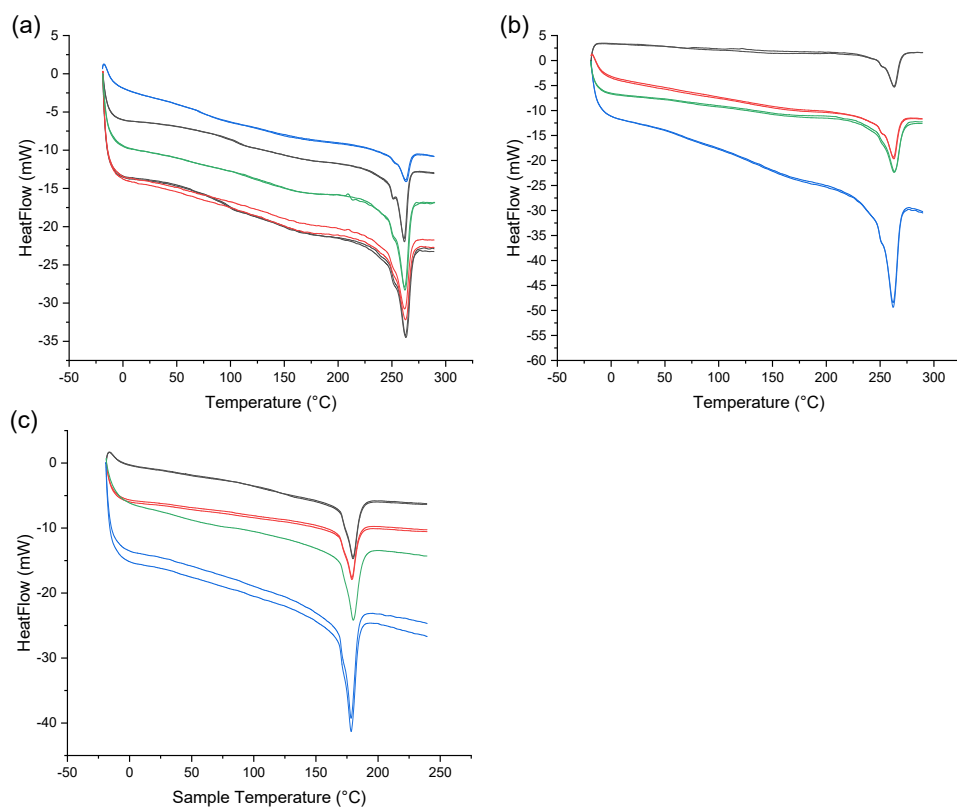

Figure S2: Representative DSC responses of PA non-irradiated (black) and irradiated by gamma (red), X-ray (blue) and e-beam (green) at 50 kGy. Data were taken from the second heating ramp. (a) PA-1. (b) PA-2. (c) PA-3.

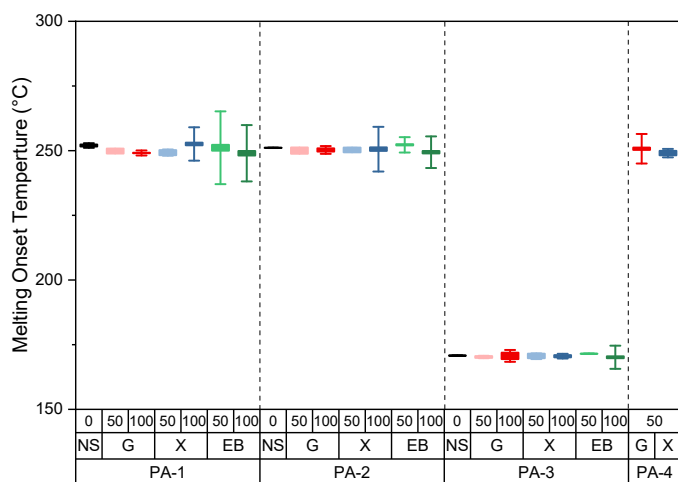

Figure S3: Melting Onset temperature for the PA-1, PA-2, PA-3, and PA-4 non-irradiated (black) and irradiated by gamma (red), X-ray (blue) and e-beam (green) at 50 and 100 kGy. The error bar represents the 95% confidence interval.
